# Supplementary material
Source: PubMed Central journal article supplement (PMC3320189)
Supplement: supp_pp.112.193672_193672Supplemental_Data_all.pdf [file supp_pp.112.193672_193672Supplemental_Data_all.pdf]

# 1 Supplemental Data

2

**Supplemental Table S1.** *BR-associated genes differentially expressed after P. graminicola infection.* See corresponding Excel file.

**Supplemental Table S2.** *GA metabolism genes significantly induced or repressed following inoculation of rice roots with P. graminicola.* Numerical values for the green-to-red gradient represent log<sub>2</sub>-fold changes relative to the non-inoculated controls. Significant expression changes (threshold of 1.5-fold change and false discovery rate [FDR] *P*<0.05) are listed in bold. Dpi = days post inoculation.

| Biological process            | Locus          | 1dpi         | 2dpi         | 4dpi                              | Description                                           |
|-------------------------------|----------------|--------------|--------------|-----------------------------------|-------------------------------------------------------|
| Diterpenoid biosynthesis      | LOC_Os04g10060 | <b>3.79</b>  | <b>3.04</b>  | <b>3.54</b>                       | 1-deoxy-D-xylulose-5-phosphate reductoisomerase       |
|                               | LOC_Os04g10010 | <b>2.88</b>  | <b>2.43</b>  | <b>2.81</b>                       | acetyl-CoA C-acetyltransferase                        |
|                               | LOC_Os12g30824 | <b>5.53</b>  | <b>3.57</b>  | <b>2.81</b>                       | farnesyl diphosphate synthase                         |
|                               | LOC_Os07g09190 | <b>3.27</b>  | <b>2.92</b>  | <b>2.69</b>                       | 4-diphosphocytidyl-2-C-methyl-D-erythritol kinase     |
|                               | LOC_Os04g09900 | <b>2.78</b>  | <b>2.27</b>  | <b>2.37</b>                       | diphosphomevalonate decarboxylase                     |
|                               | LOC_Os02g39160 | <b>2.74</b>  | <b>2.02</b>  | <b>2.34</b>                       | ent-copalyl diphosphate synthase                      |
|                               | LOC_Os07g39270 | <b>3.05</b>  | <b>1.99</b>  | <b>2.25</b>                       | ent-cassa-12,15-diene synthase                        |
|                               | LOC_Os01g01710 | <b>2.60</b>  | <b>1.89</b>  | <b>2.18</b>                       | (E)-4-hydroxy-3-methylbut-2-enyl-diphosphate synthase |
|                               | LOC_Os02g36140 | <b>3.06</b>  | <b>2.68</b>  | <b>2.14</b>                       | 2-C-methyl-D-erythritol 2,4-cyclodiphosphate synthase |
|                               | LOC_Os03g52170 | <b>2.48</b>  | <b>1.93</b>  | <b>1.97</b>                       | hydroxymethylglutaryl-CoA synthase                    |
|                               | LOC_Os11g28530 | <b>2.04</b>  | <b>1.93</b>  | <b>1.97</b>                       | 4-hydroxy-3-methylbut-2-enyl diphosphate reductase    |
|                               | LOC_Os02g45660 | <b>2.10</b>  | <b>1.79</b>  | <b>1.84</b>                       | syn-copalyl-diphosphate synthase                      |
|                               | LOC_Os01g58790 | <b>1.92</b>  | <b>1.33</b>  | <b>1.47</b>                       | momilactone-A synthase                                |
|                               | LOC_Os05g34180 | <b>0.96</b>  | <b>0.76</b>  | <b>1.02</b>                       | syn-pimara-7,15-diene synthase                        |
|                               | LOC_Os01g02020 | <b>0.61</b>  | 0.02         | 0.38                              | 1-deoxy-D-xylulose-5-phosphate synthase               |
|                               | LOC_Os03g02710 | -0.01        | <b>-0.91</b> | -0.40                             | isopentenyl-diphosphate delta-isomerase               |
|                               | LOC_Os09g34960 | -0.50        | <b>-0.61</b> | -0.49                             | 1-deoxy-D-xylulose-5-phosphate synthase               |
|                               | LOC_Os02g17780 | -0.95        | <b>-2.04</b> | -0.59                             | geranylgeranyl diphosphate synthase, type II          |
|                               | LOC_Os08g40180 | -0.26        | <b>-0.77</b> | <b>-0.72</b>                      | hydroxymethylglutaryl-CoA reductase (NADPH)           |
|                               | LOC_Os02g01760 | -0.91        | <b>-0.71</b> | <b>-0.75</b>                      | hydroxymethylglutaryl-CoA synthase                    |
| LOC_Os05g33840                | 0.40           | <b>-1.42</b> | <b>-1.30</b> | stemar-13-ene synthase            |                                                       |
| LOC_Os01g50760                | <b>-1.13</b>   | <b>-1.39</b> | <b>-2.04</b> | ent-sandaracopimaradiene synthase |                                                       |
| GA <sub>12</sub> biosynthesis | LOC_Os06g37224 | <b>2.03</b>  | <b>2.30</b>  | <b>1.96</b>                       | ent-kaurene oxidase                                   |
|                               | LOC_Os06g37300 | <b>3.90</b>  | <b>3.13</b>  | <b>3.24</b>                       | D35, ent-kaurene oxidase                              |
| GA biosynthesis               | LOC_Os05g34854 | <b>-1.03</b> | 0.34         | 0.69                              | gibberellin 20-oxidase                                |
|                               | LOC_Os07g01340 | -0.54        | <b>-1.03</b> | 0.52                              | gibberellin 20-oxidase                                |
| GA inactivation               | LOC_Os01g55240 | <b>2.16</b>  | <b>1.78</b>  | <b>2.00</b>                       | gibberellin 2-beta-dioxygenase (GA2ox3)               |
|                               | LOC_Os05g43880 | <b>2.02</b>  | <b>1.79</b>  | <b>1.25</b>                       | gibberellin 2-beta-dioxygenase                        |

3

4

5

6

7

**Supplemental Table S3.** *Primer sequences used in quantitative RT-PCR.*

| Gene            | Locus          | Forward                       | Reverse                     |
|-----------------|----------------|-------------------------------|-----------------------------|
| <i>OsACTIN1</i> | LOC_Os03g50885 | GCGTGGACAAAAGTTTTCAACCG       | TCTGGTACCCTCATCAGGCATC      |
| <i>OsBLE2</i>   | LOC_Os07g45570 | ACCAGCTGATCATAAGGCGGTGC       | GGTGAACATCCTCGTGGCTTCTAG    |
| <i>OsXTH1</i>   | LOC_Os04g51460 | GGTGGAGGTCCAAGAACACGTACC      | TCCGACATGAAGTAGCAGGTGGTG    |
| <i>OsCPD1</i>   | LOC_Os11g04710 | TTCCTTCTCCATCCCCTTTCCTCTCGCCA | CACCCTCCGCCTCAAGAAGCTCCTCAA |
| <i>OsDWARF2</i> | LOC_Os01g10040 | ATTGTCGGCCTCATGTCCCTCC        | TCGCCATCTTCTTCTGGCCTGG      |
| <i>OsRAVLI</i>  | LOC_Os04g49230 | TCCTCACCAACTCCACATTACGGT      | CAGATCGAGATCCAACGAGGA       |
| <i>OsMADS55</i> | LOC_Os06g11330 | TGGAAGAGCTGCAGCAGATG          | TCATCACAGATTCAGATGATTG      |
| <i>OsNPR1</i>   | LOC_Os01g09800 | CACGCCTAAGCCTCGGATTA          | TCAGTGAGCAGCATCCTGACT       |
| <i>OsWRKY45</i> | LOC_Os05g25770 | GGACGCAGCAATCGTCCGGG          | CGGAAGTAGGCCTTTGGGTGC       |
| <i>GA2ox3</i>   | LOC_Os01g55240 | TTCGGGTACGGCAGCAAGCG          | TCAGAGCGGCCCGGAAGACC        |
| <i>GA20ox3</i>  | LOC_Os07g07420 | CTCGAGTTCACGCAGAGGCACTAC      | TGTCGAGGCTTTCATAGCCATTCC    |
| <i>SLRI</i>     | LOC_Os06g03710 | GCGTTCGGGCGAGTGACGTG          | CGCTGCGGGTGCTCATCTG         |
| <i>SPINDLY</i>  | LOC_Os08g44510 | TGCGGAGGCATGCAACAACC          | AGCAGCATCCATCTTCCCTGGAC     |
| <i>ELI</i>      | LOC_Os03g57940 | TTCAGTGGGACAGGCGATGTCTG       | GACCTAAGTGGGCATGGACGCTAG    |

8

## 9 Supplemental Figures

10 **Supplemental Figure S1.** Effect of BL pretreatment on resistance to *P. graminicola* in the  
11 BR-deficient mutant *d2-2*.

12

13 **Supplemental Figure S2.** Morphology and dynamics of *P. graminicola* colonization of rice  
14 roots.

15

16 **Supplemental Figure S3.** Expression of BR-responsive (*OsBLE2*, *OsXTH1*) and BR  
17 biosynthetic (*OsCPD1*, *OsDWARF2*) genes in wild-type T65 and signal-defective *d61-1*  
18 seedlings inoculated with *P. graminicola*.

19

20 **Supplemental Figure S4.** Effect of BL pretreatment on transcript accumulation of the SA  
21 marker genes *OsNPR1* and *OsWRKY45* in roots of cv Nipponbare inoculated with *P.*  
22 *graminicola*.

23

24 **Supplemental Figure S5.** Repression of GA biosynthesis is an integral part of BR-mediated  
25 susceptibility to *P. graminicola*.

26

27 **Figure S6.** Uniconazole treatment mimics BL-induced susceptibility but attenuates BRZ-  
28 triggered resistance.

29

30 **Supplemental Figure S7.** Physiological read-outs of GA-BL interactions in rice leaf and root  
31 tissue.

32

33 **Supplemental Figure S8.** Effect of BL pretreatment on transcript accumulation of the  
34 DELLA gene *SLR1* in roots of cv Nipponbare inoculated with *P. graminicola*.

35

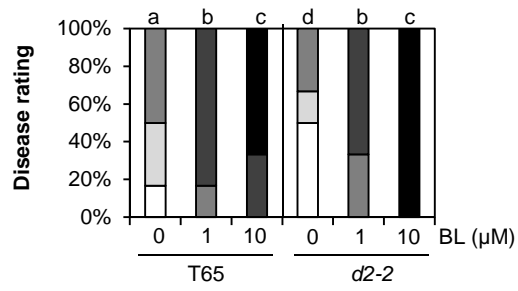

**Supplemental Figure S1.** Effect of BL pretreatment on resistance to *P. graminicola* in the BR-deficient mutant *d2-2*. Seeds (cv Nipponbare) were germinated on Gamborg B5 medium containing different concentrations of BL and, 3 days post imbibition, inoculated with 0.6-cm mycelial plugs of virulent *P. graminicola* PB912 132. Bars with different letters are significantly different (Mann-Whitney;  $n \geq 12$  ;  $\alpha = 0.05$ ). Chemical treatments, infection with *P. graminicola* 132, and disease evaluation were performed exactly as described in Fig. 1.

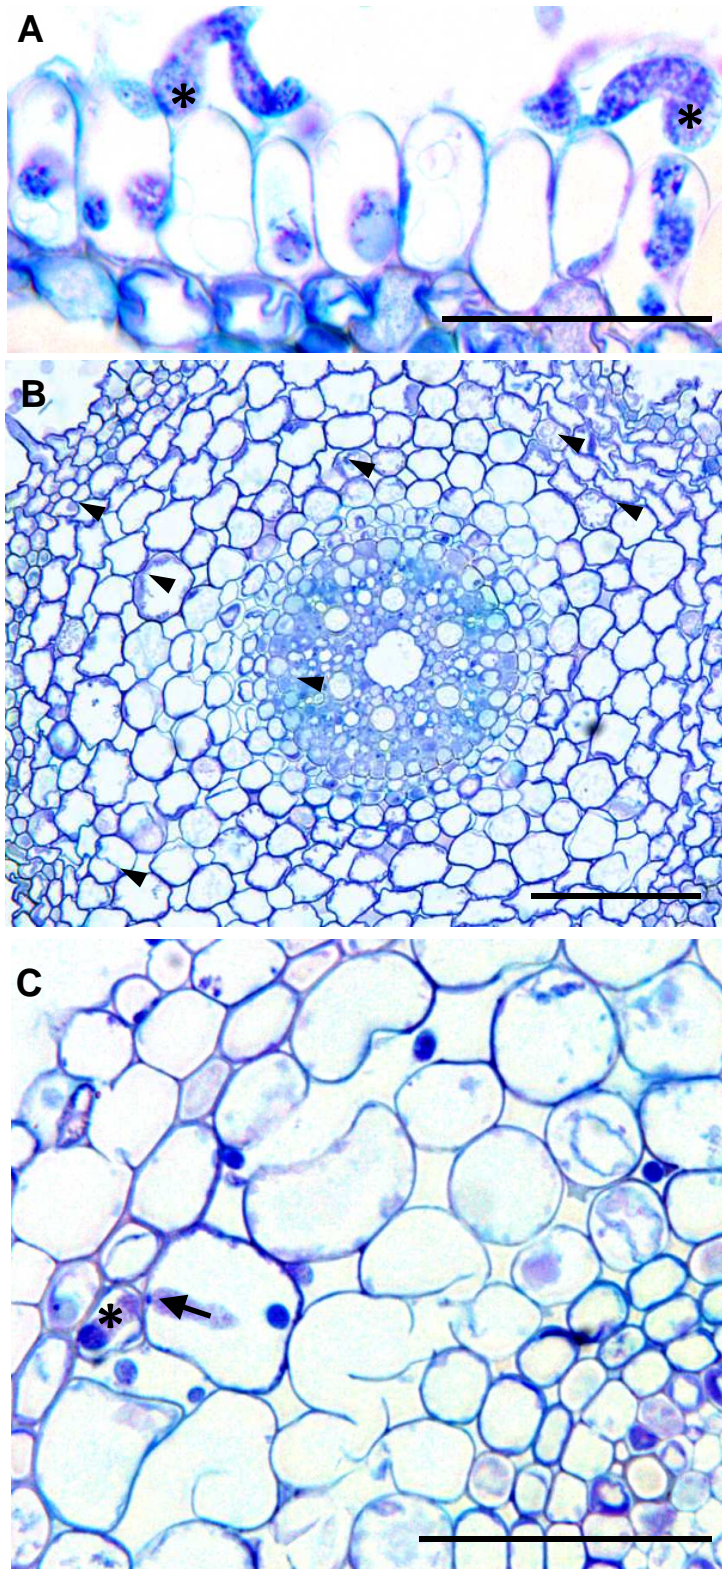

**Supplemental Figure S2.** Morphology and dynamics of *P. graminicola* colonization of rice roots. **A**, Penetration of root epidermal cells by appressoria-like structures (asterisks). **B**, Vigorous invasion of epidermis, cortex, endodermis and vascular tissue by intracellular hyphae (arrowheads) in roots of cultivar Nipponbare at 2 days post inoculation. Bar = 100  $\mu$ M. **C**, Bulbiform invading hyphae (asterisks) show a dramatic constriction (black arrow) prior to spreading to neighbouring cells. Bars = 50  $\mu$ M. Pathogen mycelium was stained with Trypan Blue and visualized using bright field microscopy.

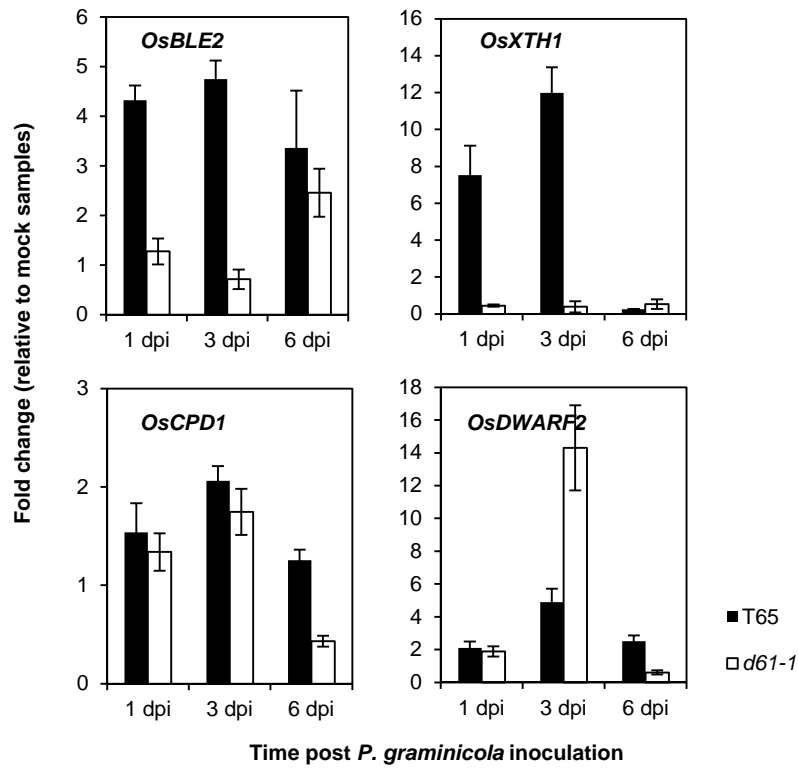

**Supplemental Figure S3.** Expression of BR-responsive (*OsBLE2*, *OsXTH1*) and BR biosynthetic (*OsCPD1*, *OsDWARF2*) genes in wild-type T65 and signal-defective *d61-1* seedlings inoculated with *P. graminicola*. Transcript levels were normalized using actin as an internal reference and for each time point expressed relative to the normalized expression levels in the respective mock-inoculated control. dpi = days post inoculation.

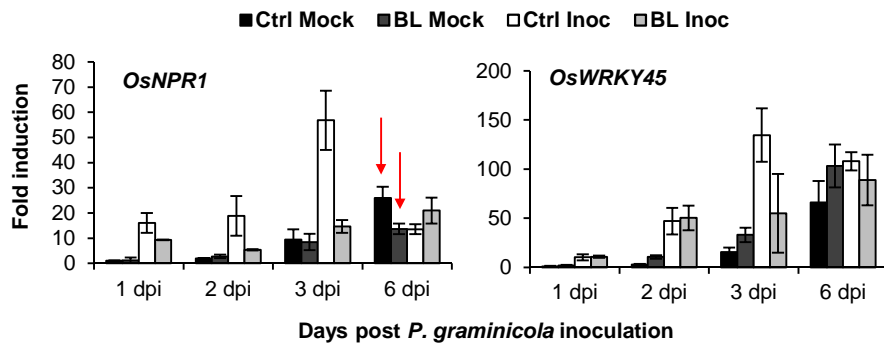

**Supplemental Figure S4.** Effect of BL pretreatment on transcript accumulation of the SA marker genes *OsNPR1* and *OsWRKY45* in roots of cv Nipponbare inoculated with *P. graminicola*. RNA was extracted at the indicated times after inoculation, converted to cDNA and subjected to quantitative PCR analyses. Data are the same as those shown in Figure 3C, but expressed relative to the normalized expression levels in mock-treated control plants at 1 dpi.

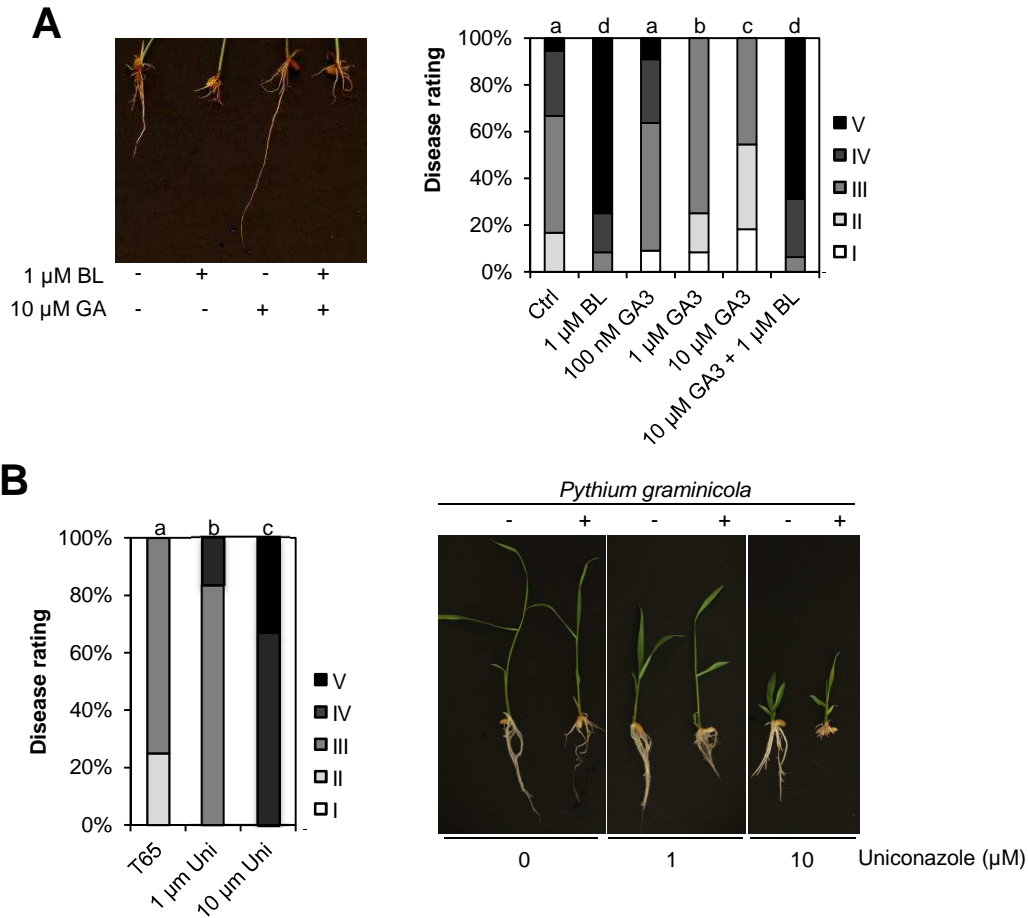

**Supplemental Figure S5.** Repression of GA biosynthesis is an integral part of BR-mediated susceptibility to *P. graminicola*. **A**, Exogenous BL application suppresses GA<sub>3</sub>-induced resistance. Different letters indicate statistically significant differences (Mann-Whitney;  $n = 12$ ;  $\alpha = 0.05$ ). **B**, Effect of Uniconazole, a GA biosynthesis inhibitor, on basal resistance to *P. graminicola*. Bars with different letters are significantly different (Mann-Whitney;  $n \geq 12$ ;  $\alpha = 0.05$ ). Chemical treatments, infection with *P. graminicola* 132, and disease evaluation were performed exactly as described in Fig. 1. Pictures were taken either 7 (panel B) or 10 (panel A) days post inoculation. Data represent one of three independent experiments with similar results



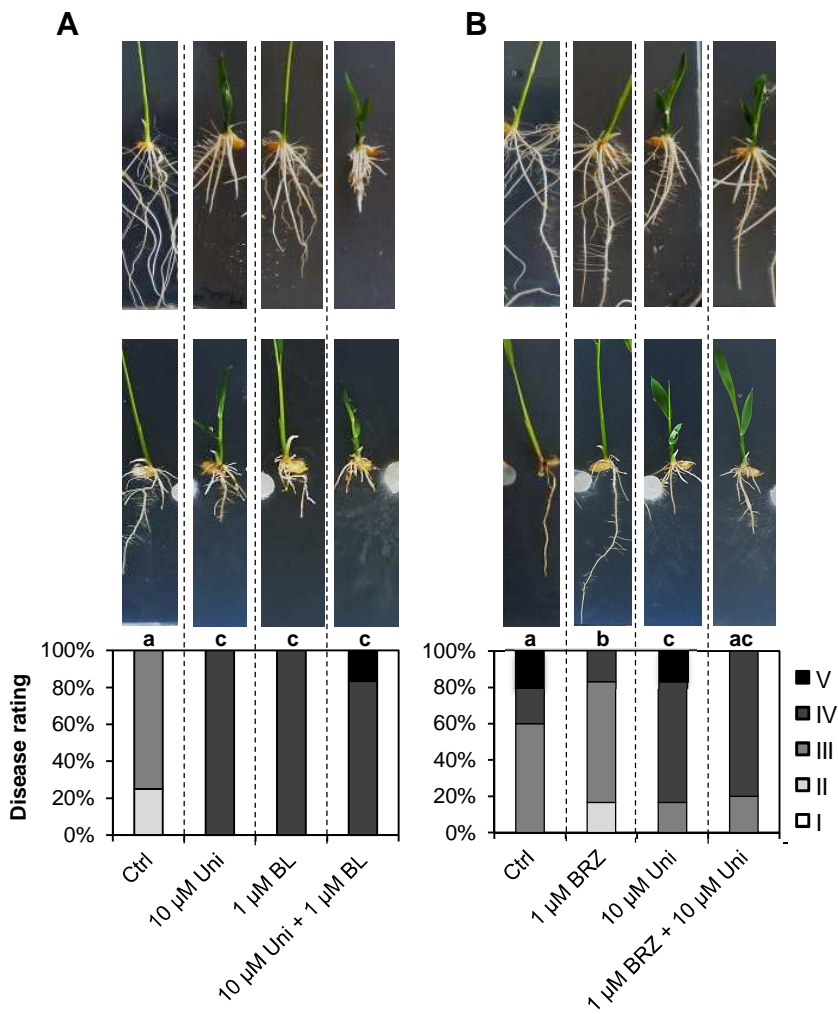

**Figure S6. Uniconazole treatment mimics BL-induced susceptibility but attenuates BRZ-triggered resistance.** Different letters indicate statistically significant differences (Mann-Whitney;  $n \geq 21$ ;  $\alpha = 0.05$ ). Chemical treatments, infection with *P. graminicola* 132, and disease evaluation were performed exactly as described in Fig. 1. Pictures were taken 7 days post inoculation; upper panels show non-inoculated controls, lower panels depict representative disease symptoms. Experiments were repeated at least twice with nearly identical results.

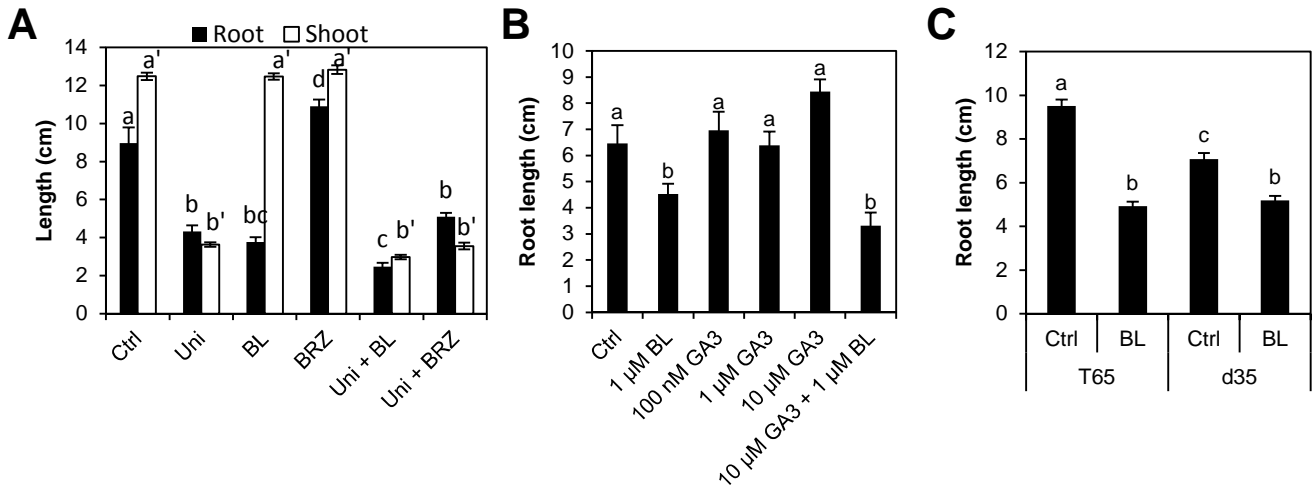

**Supplemental Figure S7.** Physiological read-outs of GA-BL interactions in rice leaf and root tissue. **A**, Root and shoot length of 10-day-old seedlings grown on GB5 medium with or without 10  $\mu$ M uniconazole, 1  $\mu$ M BL and/or 1  $\mu$ M BRZ. Each data point represents the mean  $\pm$  SE of at least 10 seedlings. Different letters indicate statistically significant differences (Bonferroni;  $\alpha = 0.05$ ). **B**, Measurement of root lengths of 10-day-old seedlings grown in the presence or absence of different concentrations of BL and/or GA<sub>3</sub>. The results are presented as mean values  $\pm$  SE from six to 12 plants. Bars with different letters are significantly different (Mann-Whitney;  $\alpha = 0.05$ ). **C**, Root elongation of 10-day-old wild-type T65 and GA-deficient *d35* seedlings grown in the presence of 1  $\mu$ M BL. Values are mean  $\pm$  SE of at least 27 seedlings. Different letters indicate statistically significant differences (Bonferroni;  $\alpha = 0.05$ ).

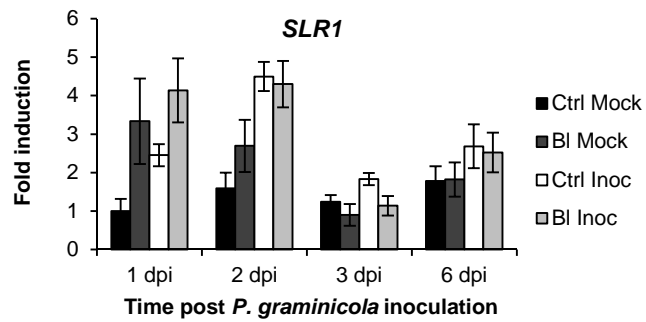

**Supplemental Figure S8.** Effect of BL pretreatment on transcript accumulation of the DELLA gene *SLR1* in roots of cv Nipponbare inoculated with *P. graminicola*. RNA was extracted at the indicated times after inoculation, converted to cDNA and subjected to quantitative PCR analyses. Transcript levels were normalized using actin as an internal reference and expressed relative to the normalized expression levels in mock-treated control plants at 1 dpi. Data are means  $\pm$  SD of two technical and two biological replicates from a representative experiment, each replicate representing a pooled sample of six individual roots. dpi = days post inoculation.
